# Supplementary material for: Isolation of Flaviviruses and Alphaviruses with Encephalitogenic Potential Diagnosed by Evandro Chagas Institute in the Period of 1954–2022: Six Decades of Discoveries
Source: Preprints.org preprint supplement (doi:10.20944/preprints202302.0197.v1), 2023-02-13
Supplement: Supplementary file 1 [file supplementary]

**Supplementary Figures**


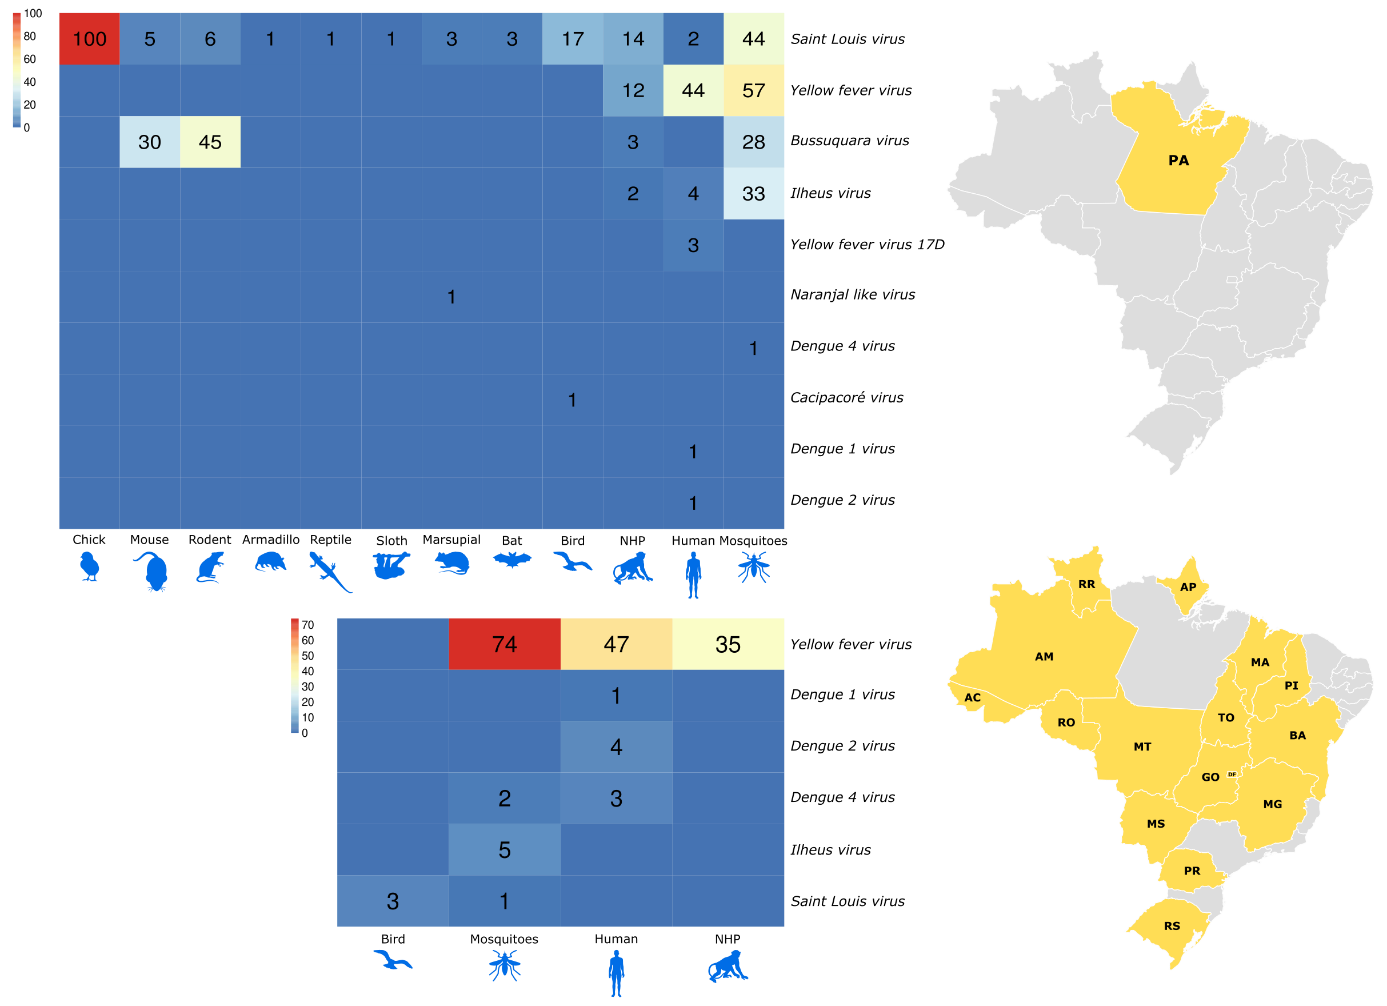


**Figure S1.** Distribution of flaviviruses isolated by the IEC in the Pará state and other federal units in Brazil.

**
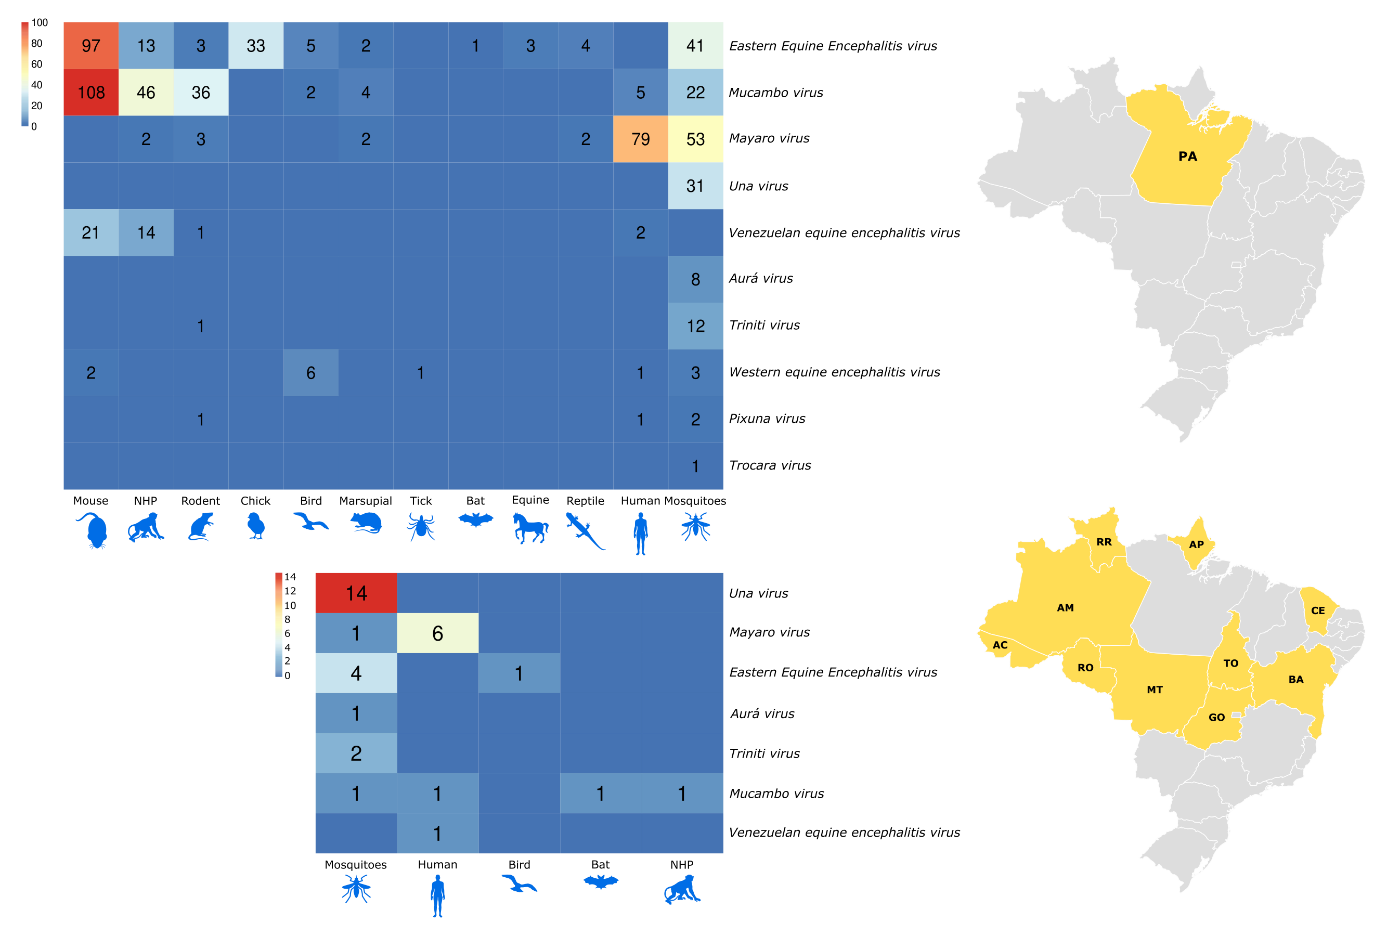
**

**Figure S2.** Distribution of alphaviruses isolated by the IEC in the Pará state and other federal units in Brazil.
